# Supplementary material
Source: PubMed Central journal article supplement (PMC6221200)

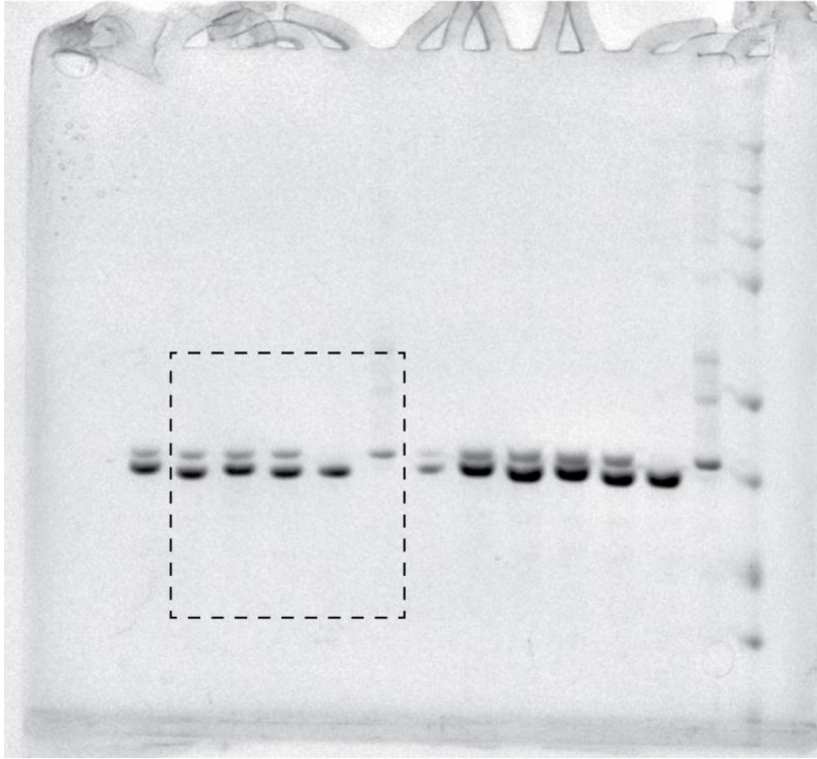

**Supplementary Figure 1.** Uncropped gel. The rectangle contains lanes shown in Fig. 3c.

Supplement: NIHMS1502928-supplement-1.pdf [file NIHMS1502928-supplement-1.pdf]
